# Supplementary material for: Stability and deactivation of Fe-ZSM-5 zeolite catalyst for catalytic wet peroxide oxidation of phenol in a membrane reactor
Source: Royal Society of Chemistry journal article supplement (doi:10.1039/c5ra05039a), 2015-01-01
Supplement: c5ra05039a1.pdf [file c5ra05039a1.pdf]

## Electronic supplementary information

Stability and deactivation of Fe-ZSM-5 zeolite catalyst for catalytic wet  
peroxide oxidation of phenol in a membrane reactor

Songshan Jiang, Huiping Zhang, Ying Yan, Xinya Zhang

*\*School of Chemistry and Chemical Engineering, South China University of  
Technology, Guangzhou 510640, PR China*

\* Corresponding author: Tel: +86 2087112047; fax: +86 2087112047.

E-mail address: cexyzh@scut.edu.cn (X.Y. Zhang).

**Figure contents:**

**Fig. S1.** TGA profiles of the uncalcined Fe-ZSM-5 zeolite membrane catalyst.

**Fig. S2.** HPLC pattern of reaction by-products after CWPO of phenol (peak 1: phenol; peak 2: acetic acid; peak 3: formic acid; peak 4: oxalic acid).

**Fig. S3.** The standard XRD patterns of  $\alpha$ -Fe<sub>2</sub>O<sub>3</sub> and  $\gamma$ -Fe<sub>2</sub>O<sub>3</sub> from JCPDS files.

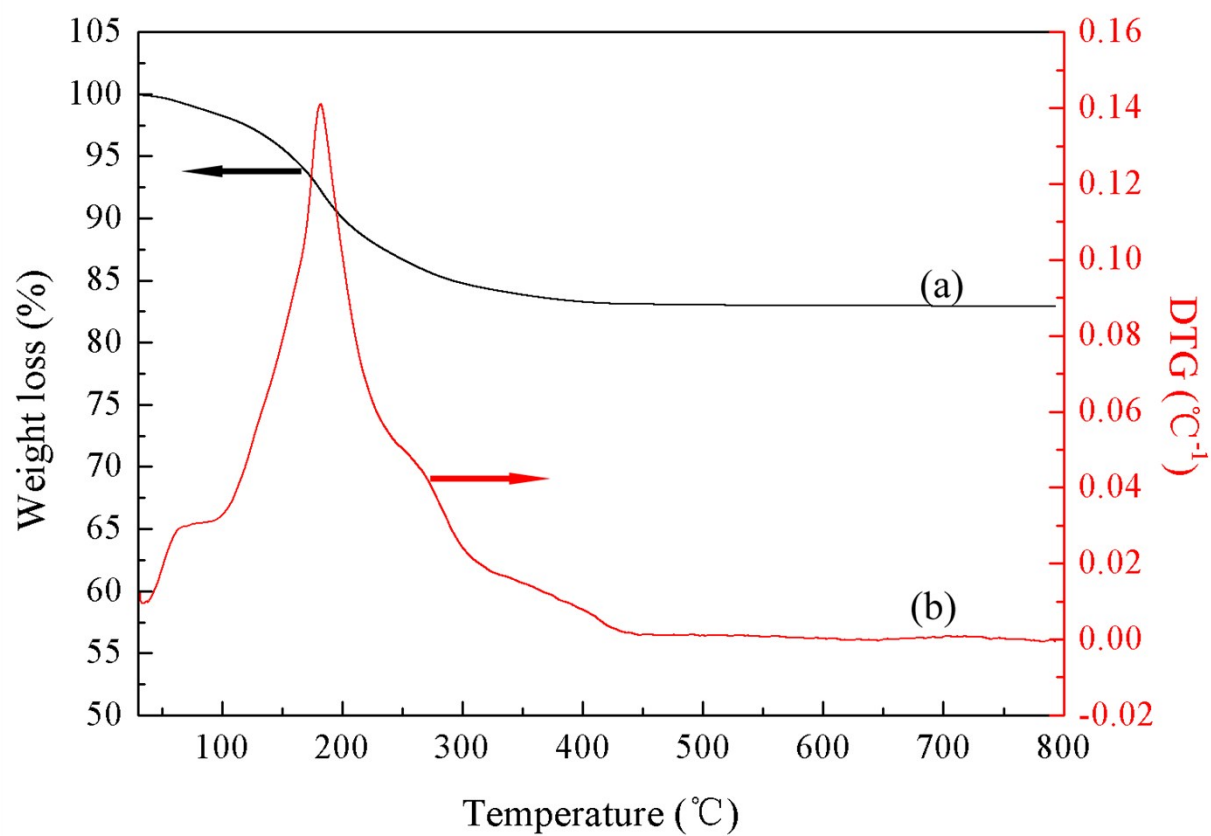

**Fig. S1.** TGA profiles of the uncalcined Fe-ZSM-5 zeolite membrane catalyst.

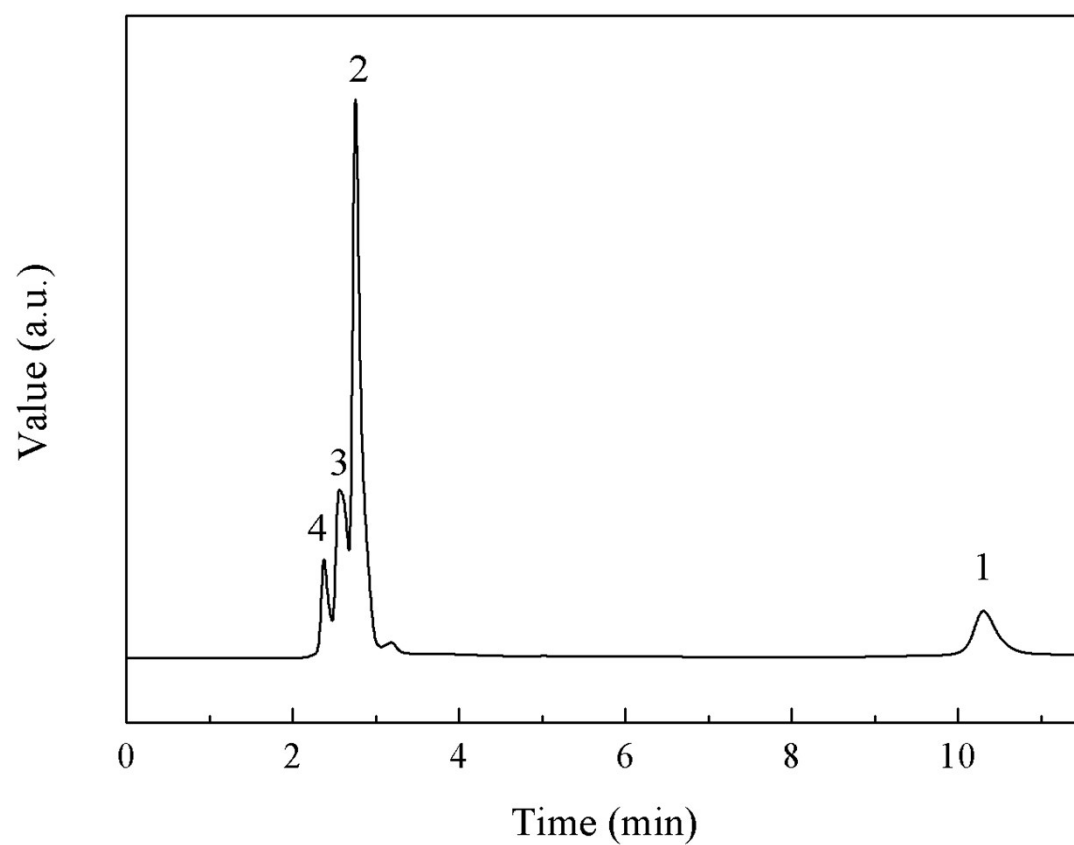

**Fig. S2.** HPLC pattern of reaction by-products after CWPO of phenol (peak 1: phenol; peak 2: acetic acid; peak 3: formic acid; peak 4: oxalic acid).

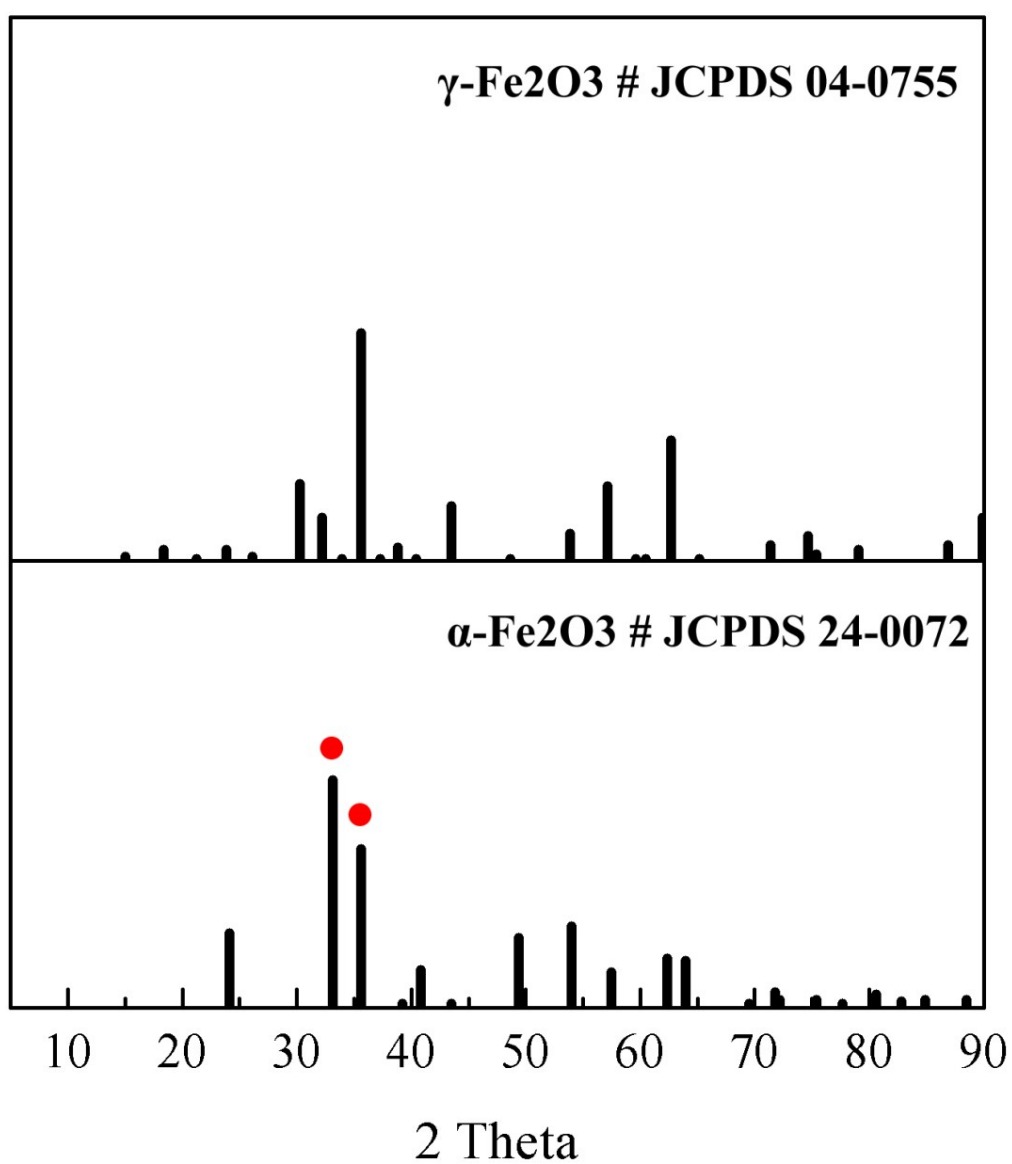

**Fig. S3.** The standard XRD patterns of  $\alpha\text{-Fe}_2\text{O}_3$  and  $\gamma\text{-Fe}_2\text{O}_3$  from JCPDS files.
